# Supplementary material for: Species-Specific Activity of HIV-1 Vpu and Positive Selection of Tetherin Transmembrane Domain Variants
Source: PLOS journal article supplement (doi:10.1371/journal.ppat.1000300), 2009-02-13
Supplement: S2 (10.1371/journal.ppat.1000300.s002) [file journal.ppat.1000300.s002]

|          |                                                                                                                                     |    |    |    |    |    |
|----------|-------------------------------------------------------------------------------------------------------------------------------------|----|----|----|----|----|
|          | 10                                                                                                                                  | 20 | 30 | 40 | 50 | 60 |
| Hu       | M A S T S Y D Y C R V P M - - - - E D G D K R C K L L L G I G I L V L L I I V I - - L G V P L I I F T I K A N S E A C R D G L R     |    |    |    |    |    |
| Cpz      | M A S T L Y D Y C R V P M D D I W K K D G D K R C K L L L G I G I L M L L I I V I - - L G V P L I I F T I K A N S E A C R D G L R   |    |    |    |    |    |
| Gor      | M A S T L Y D Y C R V P M D A I L K K D G D K R C K L L L G I G I L V L L I I V I - - L G V P L I I F T I K A N S E A C R D G L R   |    |    |    |    |    |
| Gib      | M A P T L Y D Y C R V P M D D I W K K D G D K R C K L L L G I G I L V L L I I V I S - - L G V P L I I F T I K A N S E A C R D G L R |    |    |    |    |    |
| Agm      | M A P I L Y D Y C K M P M D D I W K E D G D K R C K L A - - V G I L G L L V I V L - - L G V P L I F F I I K A N S E A C Q D G L R   |    |    |    |    |    |
| Mac(n)1  | M A P I L Y D Y C K M P M D D I W K E D G D K R C K L V - - V G I L G L L V I V L - - L G V L L I F F I I K A N S E A C Q D G L R   |    |    |    |    |    |
| Mac(n)2  | M A P I L Y D Y C K R P M D D I W K E D G D K R C K L V - - V G I L G L L V I V L - - L G V L L I F F I I K A N S E A C Q D G L R   |    |    |    |    |    |
| Mac(m)db | M A P I L Y D Y C K M P M D D I W K E D G D K R C K L V - - V G I L G L L V I V L - - L G V P L I F F I I K A N S E A C Q D G L R   |    |    |    |    |    |
| Mac(m)1  | M A P I L Y D Y C K M P M D D I W K E D G D K R C K L V - - I G I L G L L V I V L - - L G V L L I F F I I K A N S E A C Q D G L R   |    |    |    |    |    |
| Mac(m)2  | M A P I L Y D Y C K M P M G D I W K E D G D K R C K L V - - I G I L G L L V I V L - - L G V L L I F F I I K A N S E A C Q D G L R   |    |    |    |    |    |
| Mac(m)3  | M A P I L Y D Y C K M P M G D I W K E D G D K R C K L V - - I G I L G L L V I V L - - L G V L L I F F I I K A N S E A C Q D G L R   |    |    |    |    |    |
| Mac(f)1  | M A P I L Y D Y C K M P M G D I W K E D G D K R C K L V - - V G I L G L L V I V L - - L G V L L I F F I I K A N S E A C Q D G L R   |    |    |    |    |    |
| Mac(f)2  | M A P I L Y D Y C K M P M G D I W K E D G D K R C I L V - - V G I L G L L V I V L - - L G V L L I F F I I K A N S E A C Q D G L R   |    |    |    |    |    |
| Sm1      | M A P I L Y D Y C R M P M G D I W K E D G D K R C K L V - - V G I L G L L V I V L - - L G V P L I F F I I K A N S E A C Q D G L R   |    |    |    |    |    |
| Sm2      | M A P I L Y D Y C R M P M G D I W K E D G D K R C K L V - - V G I L G L L V I V L - - L G V P L I F F I I K A N S E A C Q D G L R   |    |    |    |    |    |
| Mar      | M A P T L F H Y S L V P M D D F L K H E S K E R C K L P V G T G V V V L L L V I V A V A L G V L L I V Y V K K A N S E A C Q E G H R |    |    |    |    |    |

|          |                                                                                                                                   |    |    |     |     |     |     |
|----------|-----------------------------------------------------------------------------------------------------------------------------------|----|----|-----|-----|-----|-----|
|          | 70                                                                                                                                | 80 | 90 | 100 | 110 | 120 | 130 |
| Hu       | A V M E C R N V T H L L Q Q E L T E A Q K G F Q D V E A Q A A T C N H T V M A L M A S L D A E K A Q G Q K - - - K V E E L E G E I |    |    |     |     |     |     |
| Cpz      | A V M E C R N V T H L L Q Q E L T E A Q K G F Q D V E A Q A A T C N H T V M A L M A S L D A E K A Q G Q K - - - K V E E L E G E I |    |    |     |     |     |     |
| Gor      | A V M E C R N V T H L L Q Q E L T E A Q K G F Q D V E A Q A A T C N H T V M A L M A S L D A E K A Q G Q K - - - K V E E L E G E I |    |    |     |     |     |     |
| Gib      | A V M E C R N V T H L L Q Q E L T E A Q K G F Q D A E A Q A A T C N Q T V M A L M A S L D A E K A Q G Q K - - - K V E E L E G E I |    |    |     |     |     |     |
| Agm      | A V M E C H N V T Y L L Q Q E L A E A Q R G F R D A E A Q A V T C N Q T V M A L M A S L D A E K A Q G R K - - - K V E E L E G E I |    |    |     |     |     |     |
| Mac(n)1  | A V M E C R N V T Y L L Q Q E L A E A Q R G F R D A E A Q A V T C N Q T V M A L M A S L D A E K A Q G R K - - - K V E E L E G E I |    |    |     |     |     |     |
| Mac(n)2  | A V M E C R N V T Y L L Q Q E L A E A Q R G F R D A E A Q A V T C N Q T V M A L M A S L D A E K A Q G R K - - - K V E E L E G E I |    |    |     |     |     |     |
| Mac(m)db | A V M E C R N V T Y L L Q Q E L A E A Q R G F R D A E A Q A V T C N Q T V M A L M A S L D A E K A H G R K - - - K V E E L E G E I |    |    |     |     |     |     |
| Mac(m)1  | A V M E C R N V T Y L L Q Q E L A E A Q R G F R D A E A Q A V T C N Q T V M A L M A S L D A E K A Q G R K - - - K V E E L E G E I |    |    |     |     |     |     |
| Mac(m)2  | A V M E C R N V T Y L L Q Q E L A E A Q R G F R D A E A Q A V T C N Q T V M A L M A S L D A E K A Q G R K - - - K V E E L E G E I |    |    |     |     |     |     |
| Mac(m)3  | A V M E C R N V T Y L L Q Q E L A E A Q R G F R D A E A Q A V T C N Q T V M A L M A S L D A E K A H G R K - - - K V E E L E G E I |    |    |     |     |     |     |
| Mac(f)1  | A V M E C R N V T Y L L Q Q E L A E A Q R G F R D A E A Q A V T C N Q T V M A L M A S L D A E K A Q G R K - - - K V E E L E G E I |    |    |     |     |     |     |
| Mac(f)2  | A V M E C R N V T Y L L Q Q E L A E A Q R G F R D A E A Q A V T C N Q T V M A L M A S L D A E K A Q G R K - - - K V E E L E G E I |    |    |     |     |     |     |
| Sm1      | A V M E C R N V T Y L L Q Q E L A E A Q R G F R D A E E Q A V T C N Q T V V A L M A S L D A E K A Q G R K - - - K V E E L E G E I |    |    |     |     |     |     |
| Sm2      | A V M E C R N V T Y L L Q Q E L A E A Q R G F R D A E A Q A V T C N Q T V V A L M A S L D A E K A Q G R K - - - K V E E L E G E I |    |    |     |     |     |     |
| Mar      | A V M E C R N V T H L L Q Q E L T R A Q D G F R D A E A Q I A T Y N Q T V M T L M A S L D K E K A H S L D A E K K V E E L E G E I |    |    |     |     |     |     |

|          |                                                                                                                             |     |     |     |     |     |
|----------|-----------------------------------------------------------------------------------------------------------------------------|-----|-----|-----|-----|-----|
|          | 140                                                                                                                         | 150 | 160 | 170 | 180 | 190 |
| Hu       | T T L N H K L Q D A S A E V E R L R R E N Q V L S V R I A D K K Y Y P S S Q D S - S S A A A P Q L L I V L L G L S A L L Q   |     |     |     |     |     |
| Cpz      | T T L N H K L Q D A S A E V E R L R R E N Q V L S V R I A D K K Y Y P S S Q D S - S S A A A P Q L L I V L L G L S A L L Q   |     |     |     |     |     |
| Gor      | T T L N H K L Q D A S A E V E R L R R E N Q V L S V R I A D T K K Y Y P S S Q D S - S S A A A P Q L L I V L L G L S A L L Q |     |     |     |     |     |
| Gib      | T T L N H K L Q D A S A E V E R L R R E N Q V L S V R I A D K K Y S A S S Q D S - S S A A A P Q L L I L L L G L S A L L L   |     |     |     |     |     |
| Agm      | T T L N H K L Q D A S A E V E R L R R E N Q V L N V R I A D T N S - A S S Q D S - S C A A E P P L L I L L L G L G A L L L   |     |     |     |     |     |
| Mac(n)1  | T T L N H K L Q D A S A E V E R L R R E N H V L N A R I A D T D S - A S S Q D S - S C A A E P P L L I L L L G L S A L L L   |     |     |     |     |     |
| Mac(n)2  | T T L N H K L Q D A S A E V E R L R R E N H V L N A R I A D T D S - A S S Q D S - S C A A E P P L L I L L L G L S A L L L   |     |     |     |     |     |
| Mac(m)db | T T L N H K L Q D A S A E V E R L R R E N H V L N A R I A D T D S - A S P Q D S - S C A A E P P L L I L L L G L S A L L L   |     |     |     |     |     |
| Mac(m)1  | T T L N H K L Q D A S A E V E R L R R E N H V L N A R I A D T D S - A S P Q D S - S C A A E P P L L I L L L G L S A L L L   |     |     |     |     |     |
| Mac(m)2  | T T L N H K L Q D A S A E V E R L R R E N H V L N A R I A D T D S - A S P Q D S - S C A A E P P L L I L L L G L S A L L L   |     |     |     |     |     |
| Mac(m)3  | T T L N H K L Q D A S A E V E R L R R E N H V L N A R I A D T D S - A S S Q D S - S C A A E P P L L I L L L G L S A L L L   |     |     |     |     |     |
| Mac(f)1  | T T L N H K L Q D A S A E V E R L R R E N H V L N A R I A D T D S - A S S Q D S - S C A A E P P L L I L L L G L S A L L L   |     |     |     |     |     |
| Mac(f)2  | T T L N H K L Q D A S A E V E R L R R E N H V L N A R I A D T D S - A S S Q D S - S C A A E P P L L I L L L G L S A L L L   |     |     |     |     |     |
| Sm1      | T T L N H K L Q D A S A E V E R L R R E N H V L N A R I A D T D S - A S S Q D S - S C A A E P P L L I L L L G L G A L L L   |     |     |     |     |     |
| Sm2      | T T L N H K L Q D A S A E V E R L R R E N H V L N A R I A D T D S - A S S Q D S - S C A A E P P L L I L L L G L S A L L L   |     |     |     |     |     |
| Mar      | T T L N Q K L Q D A S M E V E R L R R K N Q D L S A R I A D Q K N S A S S L K D T S S A A A P L L L I L L L G L S A R L L   |     |     |     |     |     |
